# Supplementary material for: An expanded phylogeny for the genus Phytophthora
Source: PubMed Central journal article supplement — IMA Fungus. 2017 Nov 21;8(2):355–84. doi: 10.5598/imafungus.2017.08.02.09 (PMC5729717; doi:10.5598/imafungus.2017.08.02.09), 2017-11-21
Supplement: ima-8-355-SD1.pdf [file ima-8-355-SD1.pdf]

# Supplementary Table 1

**Supplementary Table 1.** Information of all isolates included in the phylogenetic analyses including local, international and alternative isolate numbers, species identities, hosts and substrates, origins, year, sporangial papillation and GenBank accession numbers.

| (Sub)clade | Species                     | Isolate identification |                 |              |        |      |                           |          |          |          |          | GenBank accession numbers |          |          |      |  |  |  |  |  |  |
|------------|-----------------------------|------------------------|-----------------|--------------|--------|------|---------------------------|----------|----------|----------|----------|---------------------------|----------|----------|------|--|--|--|--|--|--|
|            |                             | Local (CH)             | CBS             | ATCC         | IMI    | WPC  | M.Gallegly                | Other    | 60S      | β-TUB    | EF1a     | Enolase                   | HSP90    | 28S      | TiGa |  |  |  |  |  |  |
| 1a         | <i>P. cactorum</i>          | 22E6                   |                 |              | P10194 | p25  | S814 (Schmittthener)      | KX250369 | KX250370 | KX250371 | KX250372 | KX250373                  | KX250374 | KX250375 |      |  |  |  |  |  |  |
| 1a         | <i>P. cactorum</i>          | 22E7                   | 16693           | 021168       | P0715  | p6   | IFO 31151, N93, NCTC 2082 | EU080284 | EU080285 | EU080286 | EU080287 | EU080288                  | EU080289 | EU080290 |      |  |  |  |  |  |  |
| 1a         | <i>P. cactorum</i>          | 22E8                   | 16694, MYA-3653 | 050470       | P10193 | p7   | N94                       | KX250376 | KX250377 | KX250378 | KX250379 | KX250380                  | KX250381 | KX250382 |      |  |  |  |  |  |  |
| 1a         | <i>P. hedraiaandra</i>      | 33F3                   | MYA-4165        |              | p225   | p225 | MNT8 (Blanchette)         | KX250383 | KX250384 | KX250385 | KX250386 | KX250387                  | KX250388 | KX250389 |      |  |  |  |  |  |  |
| 1a         | <i>P. hedraiaandra</i>      | 38C2                   |                 |              | P19523 |      |                           | KX250390 | KX250391 | KX250392 | KX250393 | KX250394                  | KX250395 | KX250396 |      |  |  |  |  |  |  |
| 1a         | <i>P. hedraiaandra</i>      | 62A5                   | 111725          |              |        |      |                           | KX250397 | KX250398 | KX250399 | KX250400 | KX250401                  | KX250402 | KX250403 |      |  |  |  |  |  |  |
| 1a         | <i>P. idaei</i>             | 34D4                   | 971,95          | MYA-4065     | 313728 | p220 | SCRI R77, PD 94/959       | EU080129 | EU080130 | EU080131 | EU080132 | EU080133                  | EU080134 | EU080135 |      |  |  |  |  |  |  |
| 1a         | <i>P. idaei</i>             | 62A1                   | 968,95          |              |        |      | SCRI R23, IDA 1           | KX250404 | KX250405 | KX250406 | KX250407 | KX250408                  | KX250409 | KX250410 |      |  |  |  |  |  |  |
| 1a         | <i>P. pseudotsugae</i>      |                        | 52938           | 331662       | P10339 |      | 268 (Hansen)              | EU080426 | EU080427 | EU080428 | EU080429 | EU080430                  | EU080431 | EU080432 |      |  |  |  |  |  |  |
| 1a         | <i>P. aff. hedraiaandra</i> | 33F4                   |                 |              |        | p226 | MNT63 (Blanchette)        | KX250411 | KX250412 | KX250413 | KX250414 | KX250415                  | KX250416 | KX250417 |      |  |  |  |  |  |  |
| 1a         | <i>P. aff. pseudotsugae</i> | 29B3                   |                 |              | p185   | p185 | 333 (Hansen)              | KX250418 | KX250419 | KX250420 | KX250421 | KX250422                  | KX250423 | KX250424 |      |  |  |  |  |  |  |
| 1b         | <i>P. clandestina</i>       | 32G1                   | 347,86          | 58713, 60438 | 278933 | p200 | DAR 49489                 | EU079866 | EU079867 | EU079868 | EU079869 | EU079870                  | EU079871 | EU079872 |      |  |  |  |  |  |  |
| 1b         | <i>P. clandestina</i>       | 33D8                   | MYA-4064        | 287317       |        | p215 | SCRIP197 CLA2             | KX250425 | KX250426 | KX250427 | KX250428 | KX250429                  | KX250430 | KX250431 |      |  |  |  |  |  |  |
| 1b         | <i>P. clandestina</i>       | 38D4                   |                 |              | p304   | p304 | HLNat 148                 | KX250432 | KX250433 | KX250434 | KX250435 | KX250436                  | KX250437 | KX250438 |      |  |  |  |  |  |  |
| 1b         | <i>P. iranica</i>           | 61J4                   | 374,72          | 60237        | 158964 | p218 | DCSCRIP386, UQ2132        | KX250439 | KX250440 | KX250441 | KX250442 | KX250443                  | KX250444 | KX250445 |      |  |  |  |  |  |  |
| 1b         | <i>P. tentaculata</i>       | 29F2                   | 552,96          |              | P8497  |      | BBA 65520                 | EU079955 | EU079956 | EU079957 | EU079958 | EU079959                  | EU079960 | EU079961 |      |  |  |  |  |  |  |
| 1b         | <i>P. tentaculata</i>       | 30D5                   |                 |              |        |      | PD97/5552                 | KX250446 | KX250447 | KX250448 | KX250449 | KX250450                  | KX250451 | KX250452 |      |  |  |  |  |  |  |
| 1b         | <i>P. tentaculata</i>       | 30G8                   | MYA-3655        |              |        |      | KK6-99-KT                 | KX250453 | KX250454 | KX250455 | KX250456 | KX250457                  | KX250458 | KX250459 |      |  |  |  |  |  |  |
| 1c         | <i>P. andina</i>            | 60A2                   |                 |              | p460   | p460 | EC3394                    | KX250460 | KX250461 | KX250462 | KX250463 | KX250464                  | KX250465 | KX250466 |      |  |  |  |  |  |  |
| 1c         | <i>P. andina</i>            | 60A3                   |                 |              | p461   | p461 | EC3425                    | KX250467 | KX250468 | KX250469 | KX250470 | KX250471                  | KX250472 | KX250473 |      |  |  |  |  |  |  |
| 1c         | <i>P. andina</i>            |                        |                 |              | P13365 |      | EC3365                    | EU080182 | EU080183 | EU080184 | EU080185 | EU080186                  | EU080187 | EU080188 |      |  |  |  |  |  |  |
| 1c         | <i>P. infestans</i>         | 27A8                   |                 |              |        |      | KDT-2C                    | KX250474 | KX250475 | KX250476 | KX250477 | KX250478                  | KX250479 | KX250480 |      |  |  |  |  |  |  |
| 1c         | <i>P. infestans</i>         |                        |                 |              | P10650 |      |                           | EU079625 | EU079626 | EU079627 | EU079628 | EU079629                  | EU079630 | EU079631 |      |  |  |  |  |  |  |
| 1c         | <i>P. ipomoeae</i>          | 31B4                   |                 |              | P10226 |      | PIC99165                  | EU080837 | EU080838 | EU080839 | EU080840 | EU080841                  | EU080842 | EU080843 |      |  |  |  |  |  |  |
| 1c         | <i>P. ipomoeae</i>          | 31B5                   | 109229          |              | P10225 |      | PIC99169, MUCL 30219      | EU080830 | EU080831 | EU080832 | EU080833 | EU080834                  | EU080835 | EU080836 |      |  |  |  |  |  |  |
| 1c         | <i>P. ipomoeae</i>          | 31B6                   |                 |              | P10227 |      | PIC99193                  | EU080844 | EU080845 | EU080846 | EU080847 | EU080848                  | EU080849 | EU080850 |      |  |  |  |  |  |  |
| 1c         | <i>P. mirabilis</i>         | 30C1                   | 64069, MYA-4062 |              | P3006  | p145 | Hohl NR 188, M8           | KX250481 | KX250482 | KX250483 | KX250484 | KX250485                  | KX250486 | KX250487 |      |  |  |  |  |  |  |
| 1c         | <i>P. mirabilis</i>         | 30C2                   | 64070, MYA-4063 |              | P3007  | p153 | Hohl NR 189, M9           | KX250488 | KX250489 | KX250490 | KX250491 | KX250492                  | KX250493 | KX250494 |      |  |  |  |  |  |  |
| 1c         | <i>P. phaseoli</i>          | 23B4                   |                 |              |        | p106 |                           | KX250495 | KX250496 | KX250497 | KX250498 | KX250499                  | KX250500 | KX250501 |      |  |  |  |  |  |  |
| 1c         | <i>P. phaseoli</i>          | 35B6                   |                 |              | P10145 |      | PhyP13                    | KX250502 | KX250503 | KX250504 | KX250505 | KX250506                  | KX250507 | KX250508 |      |  |  |  |  |  |  |
| 1c         | <i>P. phaseoli</i>          |                        |                 |              | P10150 |      | PhyP4                     | EU080748 | EU080749 | EU080750 | EU080751 | EU080752                  | EU080753 | EU080754 |      |  |  |  |  |  |  |
| 1c         | <i>P. phaseoli</i>          |                        |                 |              | P10150 |      | PhyPF                     | EU080761 | EU080762 | EU080763 | EU080764 | EU080765                  | EU080766 | EU080767 |      |  |  |  |  |  |  |
| 1          | <i>P. nicotianae</i>        | 22F9                   | 15410, MYA-4037 |              |        | p23  | N25                       | KX250509 | KX250510 | KX250511 | KX250512 | KX250513                  | KX250514 | KX250515 |      |  |  |  |  |  |  |
| 1          | <i>P. nicotianae</i>        | 22G1                   | 15409, MYA-4036 |              |        | p22  | N15                       | KX250516 | KX250517 | KX250518 | KX250519 | KX250520                  | KX250521 | KX250522 |      |  |  |  |  |  |  |
| 1          | <i>P. nicotianae</i>        |                        |                 |              | P10116 |      |                           | EU079962 | EU079963 | EU079964 | EU079965 | EU079966                  | EU079967 | EU079968 |      |  |  |  |  |  |  |

Supplementary Table 1. (Continued).

| (Sub)clade | Species                     | Isolate identification |        |                 |        |        |            |                               |          |          |          |          | GenBank accession numbers |          |          |          |          |          |          |  |
|------------|-----------------------------|------------------------|--------|-----------------|--------|--------|------------|-------------------------------|----------|----------|----------|----------|---------------------------|----------|----------|----------|----------|----------|----------|--|
|            |                             | Local (CH)             | CBS    | ATCC            | IMI    | WPC    | M.Gallegly | Other                         | 60S      | β-TUB    | EF1a     | Enolase  | HSP90                     | 28S      | TigA     |          |          |          |          |  |
| 1          | <i>P. nicotianae</i>        |                        |        |                 | P1452  |        |            |                               |          |          |          | W-8      | EU080503                  | EU080504 | EU080505 | EU080506 | EU080507 | EU080508 | EU080509 |  |
| 2a         | <i>P. botryosa</i>          | 22H8                   |        | MYA-4059        |        | p44    |            | Tsao 62-2                     | KX250523 | KX250524 | KX250525 | KX250526 | KX250527                  | KX250528 | KX250529 |          |          |          |          |  |
| 2a         | <i>P. botryosa</i>          | 46C2                   |        | 26481           |        | p384   |            | Chee 1117                     | KX250530 | KX250531 | KX250532 | KX250533 | KX250534                  | KX250535 | KX250536 |          |          |          |          |  |
| 2a         | <i>P. botryosa</i>          | 62C6                   | 581,69 |                 | 136915 | P3425  |            | Chee 1075                     | KX250537 | KX250538 | KX250539 | KX250540 | KX250541                  | KX250542 | KX250543 |          |          |          |          |  |
| 2a         | <i>P. botryosa</i>          |                        |        |                 | 130422 | P6945  |            | Tan 1462                      | EU079934 | EU079935 | EU079936 | EU079937 | EU079938                  | EU079939 | EU079940 |          |          |          |          |  |
| 2a         | <i>P. citrophthora</i>      | 03E5                   |        |                 |        | p132   |            | Tsao 590                      | KX250544 | KX250545 | KX250546 | KX250547 | KX250548                  | KX250549 | KX250550 |          |          |          |          |  |
| 2a         | <i>P. citrophthora</i>      | 26H3                   |        |                 |        | p31    |            |                               | KX250551 | KX250552 | KX250553 | KX250554 | KX250555                  | KX250556 | KX250557 |          |          |          |          |  |
| 2a         | <i>P. colcasiae</i>         | 22F8                   |        | MYA-4159        |        | p47    |            |                               | KX250558 | KX250559 | KX250560 | KX250561 | KX250562                  | KX250563 | KX250564 |          |          |          |          |  |
| 2a         | <i>P. colcasiae</i>         | 35D3                   |        |                 |        | p276   |            | Uchida H1676                  | KX250565 | KX250566 | KX250567 | KX250568 | KX250569                  | KX250570 | KX250571 |          |          |          |          |  |
| 2a         | <i>P. himalsilva</i>        | 61G2                   | 128767 |                 |        |        |            | NP44                          | KX250572 | KX250573 | KX250574 | KX250575 | KX250576                  | KX250577 | KX250578 |          |          |          |          |  |
| 2a         | <i>P. himalsilva</i>        | 61G3                   | 128753 |                 |        |        |            | NP61                          | KX250579 | KX250580 | KX250581 | KX250582 | KX250583                  | KX250584 | KX250585 |          |          |          |          |  |
| 2a         | <i>P. meadii</i>            | 22G5                   |        | MYA-4043        |        | p75    |            |                               | KX250586 | KX250587 | KX250588 | KX250589 | KX250590                  | KX250591 | KX250592 |          |          |          |          |  |
| 2a         | <i>P. meadii</i>            | 61J9                   | 219,88 |                 | 129185 |        |            |                               | KX250593 | KX250594 | KX250595 | KX250596 | KX250597                  | KX250598 | KX250599 |          |          |          |          |  |
| 2a         | <i>P. occultans</i>         | 65B9                   | 101557 |                 |        |        |            | PD981818110                   | KX250600 | KX250601 | KX250602 | KX250603 | KX250604                  | KX250605 | KX250606 |          |          |          |          |  |
| 2a         | <i>P. terminalis</i>        | 65B8                   | 133865 |                 |        |        |            | PD010104885512-1              | KX250607 | KX250608 | KX250609 | KX250610 | KX250611                  | KX250612 | KX250613 |          |          |          |          |  |
| 2a         | <i>P. aff. citrophthora</i> | 26H4                   |        |                 |        | p32    |            | 678 (Tsao)                    | KX250614 | KX250615 | KX250616 | KX250617 | KX250618                  | KX250619 | KX250620 |          |          |          |          |  |
| 2a         | <i>P. aff. citrophthora</i> |                        |        |                 | 342898 | P10341 |            |                               | EU080384 | EU080385 | EU080386 | EU080387 | EU080388                  | EU080389 | EU080390 |          |          |          |          |  |
| 2a         | <i>P. aff. himalsilva</i>   | 61G4                   | 128754 |                 |        |        |            | NP86                          | KX250621 | KX250622 | KX250623 | KX250624 | KX250625                  | KX250626 | KX250627 |          |          |          |          |  |
| 2a         | <i>P. sp. 46C3</i>          | 46C3                   |        | 66767           |        | p385   |            | Moy 1413                      | KX250628 | KX250629 | KX250630 | KX250631 | KX250632                  | KX250633 | KX250634 |          |          |          |          |  |
| 2a         | <i>P. sp. P6262</i>         |                        |        |                 |        | P6262  |            | Rajalakshtmy #46              | EU079887 | EU079888 | EU079889 | EU079890 | EU079891                  | EU079892 | n.a.     |          |          |          |          |  |
| 2a         | <i>P. sp. P6310</i>         |                        |        |                 |        | P6310  |            | #066                          | EU080537 | EU080538 | EU080539 | EU080540 | EU080541                  | EU080542 | EU080543 |          |          |          |          |  |
| 2b         | <i>P. capsici</i>           | 22F4                   |        | 15399, MYA-4034 |        | p8     |            | N58                           | KX250635 | KX250636 | KX250637 | KX250638 | KX250639                  | KX250640 | KX250641 |          |          |          |          |  |
| 2b         | <i>P. capsici</i>           |                        |        | 46012           |        | P0253  |            | Romero4018                    | EU080851 | EU080852 | EU080853 | EU080854 | EU080855                  | EU080856 | EU080857 |          |          |          |          |  |
| 2b         | <i>P. capsici</i>           |                        | 121656 |                 |        | P10386 |            | OP97, Lamour 51               | EU079543 | EU079544 | EU079545 | EU079546 | EU079547                  | EU079548 | EU079549 |          |          |          |          |  |
| 2b         | <i>P. glovera</i>           | 31E5                   |        |                 |        | p167   |            | Abad 11091.1                  | KX250642 | KX250643 | KX250644 | KX250645 | KX250646                  | KX250647 | KX250648 |          |          |          |          |  |
| 2b         | <i>P. glovera</i>           | 62B4                   | 121969 |                 |        | P11685 |            | Abad 11099 No. 23. BPI 878720 | KX250649 | KX250650 | KX250651 | KX250652 | KX250653                  | KX250654 | KX250655 |          |          |          |          |  |
| 2b         | <i>P. mingei</i>            | 42B2                   |        | MYA-4554        |        | p340   |            | M218.z1                       | KX250656 | KX250657 | KX250658 | KX250659 | KX250660                  | KX250661 | KX250662 |          |          |          |          |  |
| 2b         | <i>P. mingei</i>            | 42B3                   |        | MYA-4555        |        | p341   |            | M220.z1                       | KX250663 | KX250664 | KX250665 | KX250666 | KX250667                  | KX250668 | KX250669 |          |          |          |          |  |
| 2b         | <i>P. mexicana</i>          | 45G4                   | 554,88 | 46731           | 092550 | P0646  |            | N317                          | KX250670 | KX250671 | KX250672 | KX250673 | KX250674                  | KX250675 | KX250676 |          |          |          |          |  |
| 2b         | <i>P. siskiyuensis</i>      | 41B7                   | 122779 | MYA-4187        |        | P15122 |            | Hansen WA5-030403             | KX250677 | KX250678 | KX250679 | KX250680 | KX250681                  | KX250682 | KX250683 |          |          |          |          |  |
| 2b         | <i>P. siskiyuensis</i>      | 41B8                   |        |                 |        |        |            | Hansen 33-2-7-0603            | KX250684 | KX250685 | KX250686 | KX250687 | KX250688                  | KX250689 | KX250690 |          |          |          |          |  |
| 2b         | <i>P. tropicalis</i>        | 22H5                   |        |                 |        | p27    |            | Tsao FP59                     | KX250691 | KX250692 | KX250693 | KX250694 | KX250695                  | KX250696 | KX250697 |          |          |          |          |  |
| 2b         | <i>P. tropicalis</i>        | 35C8                   | 434,91 | 76651, MYA-4218 |        | p272   |            | Uchida H245                   | KX250698 | KX250699 | KX250700 | KX250701 | KX250702                  | KX250703 | KX250704 |          |          |          |          |  |
| 2b         | <i>P. aff. capsici</i>      | 22F5                   |        | 15427, MYA-4035 |        | p9     |            | N14                           | KX250705 | KX250706 | KX250707 | KX250708 | KX250709                  | KX250710 | KX250711 |          |          |          |          |  |

Supplementary Table 1. (Continued).

| (Sub)clade | Species                      | Isolate identification |        |          |        |        |            |                           |          |          |          | GenBank accession numbers |          |          |          |  |  |  |
|------------|------------------------------|------------------------|--------|----------|--------|--------|------------|---------------------------|----------|----------|----------|---------------------------|----------|----------|----------|--|--|--|
|            |                              | Local (CH)             | CBS    | ATCC     | IMI    | WPC    | M.Gallegly | Other                     | 60S      | β-TUB    | EF1a     | Enolase                   | HSP90    | 28S      | TigA     |  |  |  |
| 2b         | <i>P. sp. brasiliensis</i>   |                        |        | 46705    |        | P0630  |            | GM11                      | EU080419 | EU080420 | EU080421 | EU080422                  | EU080423 | EU080424 | EU080425 |  |  |  |
| 2c         | <i>P. acerina</i>            | 61H1                   | 133931 |          |        |        |            | B057                      | KX250712 | KX250713 | KX250714 | KX250715                  | KX250716 | KX250717 | KX250718 |  |  |  |
| 2c         | <i>P. acerina</i>            | 61H2                   |        |          |        |        |            | B080                      | KX250719 | KX250720 | KX250721 | KX250722                  | KX250723 | KX250724 | KX250725 |  |  |  |
| 2c         | <i>P. capensis</i>           | 62C1                   | 128319 |          |        | P1819  |            |                           | KX250726 | KX250727 | KX250728 | KX250729                  | KX250730 | KX250731 | KX250732 |  |  |  |
| 2c         | <i>P. capensis</i>           | 62C2                   | 128320 |          |        | P1822  |            |                           | KX250733 | KX250734 | KX250735 | KX250736                  | KX250737 | KX250738 | KX250739 |  |  |  |
| 2c         | <i>P. capensis</i>           | 62C3                   | 128321 |          |        | P1823  |            | von Broembesen<br>8555K2B | KX250740 | KX250741 | KX250742 | KX250743                  | KX250744 | KX250745 | KX250746 |  |  |  |
| 2c         | <i>P. citricola</i>          | 33H8                   | 221,88 | 60440    | 21173  | P0716  | p396       | N107                      | KX250747 | KX250748 | KX250749 | KX250750                  | KX250751 | KX250752 | KX250753 |  |  |  |
| 2c         | <i>P. citricola</i>          | 33J2                   | 295,29 |          |        |        | p375       |                           | KX250754 | KX250755 | KX250756 | KX250757                  | KX250758 | KX250759 | KX250760 |  |  |  |
| 2c         | <i>P. multivora</i>          | 55C5                   | 124094 |          |        |        |            | WAC13201                  | KX250775 | KX250776 | KX250777 | KX250778                  | KX250779 | KX250780 | KX250781 |  |  |  |
| 2c         | <i>P. pachypleura</i>        | 61H6                   |        |          |        |        |            | 5955-2006                 | KX250782 | KX250783 | KX250784 | KX250785                  | KX250786 | KX250787 | KX250788 |  |  |  |
| 2c         | <i>P. pachypleura</i>        | 61H7                   |        |          | 502404 |        |            | 53593-2008                | KX250789 | KX250790 | KX250791 | KX250792                  | KX250793 | KX250794 | KX250795 |  |  |  |
| 2c         | <i>P. pachypleura</i>        | 61H8                   |        |          |        |        |            | 105415/09                 | KX250796 | KX250797 | KX250798 | KX250799                  | KX250800 | KX250801 | KX250802 |  |  |  |
| 2c         | <i>P. pini</i>               | 22F1                   |        | MYA-3656 |        |        | p53        |                           | KX250803 | KX250804 | KX250805 | KX250806                  | KX250807 | KX250808 | KX250809 |  |  |  |
| 2c         | <i>P. pini</i>               | 45F1                   |        | 64532    |        |        | p343       |                           | KX250810 | KX250811 | KX250812 | KX250813                  | KX250814 | KX250815 | KX250816 |  |  |  |
| 2c         | <i>P. plurivora</i>          | 22E9                   |        | MYA-3657 |        |        | p101       |                           | KX250817 | KX250818 | KX250819 | KX250820                  | KX250821 | KX250822 | KX250823 |  |  |  |
| 2c         | <i>P. plurivora</i>          | 22F2                   |        |          |        |        | p52        |                           | KX250824 | KX250825 | KX250826 | KX250827                  | KX250828 | KX250829 | KX250830 |  |  |  |
| 2c         | <i>P. plurivora</i>          | 33H9                   | 379,61 |          |        |        |            |                           | KX250831 | KX250832 | KX250833 | KX250834                  | KX250835 | KX250836 | KX250837 |  |  |  |
| 2c         | <i>P. sp. 22F3</i>           | 22F3                   |        |          |        |        | p33        | S813                      | KX250845 | KX250846 | KX250847 | KX250848                  | KX250849 | KX250850 | KX250851 |  |  |  |
| 2c         | <i>P. sp. 28D1</i>           | 28D1                   |        |          |        |        | p119       |                           | KX250761 | KX250762 | KX250763 | KX250764                  | KX250765 | KX250766 | KX250767 |  |  |  |
| 2c         | <i>P. sp. 28D1</i>           | 28D3                   |        |          |        |        | p121       |                           | KX250768 | KX250769 | KX250770 | KX250771                  | KX250772 | KX250773 | KX250774 |  |  |  |
| 2c         | <i>P. sp. citricola VIII</i> | 27D9                   |        |          |        |        |            | HHFL                      | KX250838 | KX250839 | KX250840 | KX250841                  | KX250842 | KX250843 | KX250844 |  |  |  |
| 2c         | <i>P. sp. pini-like</i>      | 56G1                   |        |          |        |        |            | Moorman 11-1958a          | KX250852 | KX250853 | KX250854 | KX250855                  | KX250856 | KX250857 | KX250858 |  |  |  |
| 2c         | <i>P. taxon emzansi</i>      | 61F2                   |        |          |        |        |            | STE-U 6272                | KX250859 | KX250860 | KX250861 | KX250862                  | KX250863 | KX250864 | KX250865 |  |  |  |
| 2c         | <i>P. taxon emzansi</i>      | 61F3                   |        |          |        |        |            | STE-U 6269                | KX250866 | KX250867 | KX250868 | KX250869                  | KX250870 | KX250871 | KX250872 |  |  |  |
| 2d         | <i>P. bishera</i>            | 29D2                   |        |          |        |        |            | Jeffers W.116             | KX250873 | KX250874 | KX250875 | KX250876                  | KX250877 | KX250878 | KX250879 |  |  |  |
| 2d         | <i>P. bishera</i>            | 31E6                   | 122081 |          |        | P10117 |            | Cg 2.3.3                  | EU080741 | EU080742 | EU080743 | EU080744                  | EU080745 | EU080746 | EU080747 |  |  |  |
| 2d         | <i>P. bishera</i>            |                        |        |          |        | P1620  |            | Benson 411                | EU080612 | EU080613 | EU080614 | EU080615                  | EU080616 | EU080617 | EU080618 |  |  |  |
| 2d         | <i>P. elongata</i>           | 33J3                   |        |          |        |        |            | SG1-1 952                 | KX250880 | KX250881 | KX250882 | KX250883                  | KX250884 | KX250885 | KX250886 |  |  |  |
| 2d         | <i>P. elongata</i>           | 33J4                   |        |          |        |        |            | SG1-1 2952                | KX250887 | KX250888 | KX250889 | KX250890                  | KX250891 | KX250892 | KX250893 |  |  |  |
| 2d         | <i>P. elongata</i>           | 55C4                   | 125799 |          |        |        |            | VHS 13482                 | KX250894 | KX250895 | KX250896 | KX250897                  | KX250898 | KX250899 | KX250900 |  |  |  |
| 2d         | <i>P. frigida</i>            | 47G6                   |        |          |        |        |            | CMW19433                  | KX250901 | KX250902 | KX250903 | KX250904                  | KX250905 | KX250906 | KX250907 |  |  |  |
| 2d         | <i>P. frigida</i>            | 47G7                   |        |          |        |        |            | CMW19434                  | KX250908 | KX250909 | KX250910 | KX250911                  | KX250912 | KX250913 | KX250914 |  |  |  |
| 2d         | <i>P. frigida</i>            | 47G8                   |        |          |        |        |            | CMW20311                  | KX250915 | KX250916 | KX250917 | KX250918                  | KX250919 | KX250920 | KX250921 |  |  |  |
| 2e         | <i>P. multivesiculata</i>    | 29E3                   | 545,96 |          |        | P10410 |            | PD 95/8679                | EU080065 | EU080066 | EU080067 | EU080068                  | EU080069 | EU080070 | EU080071 |  |  |  |
| 2e         | <i>P. multivesiculata</i>    | 30D4                   |        |          |        |        |            | PD 95/4744                | KX250922 | KX250923 | KX250924 | KX250925                  | KX250926 | KX250927 | KX250928 |  |  |  |

Supplementary Table 1. (Continued).

| (Sub)clade | Species                   | Isolate identification |        |                 |        |        |                      |       |     |       |      | GenBank accession numbers |       |     |                       |                       |                       |                       |                       |                       |                       |
|------------|---------------------------|------------------------|--------|-----------------|--------|--------|----------------------|-------|-----|-------|------|---------------------------|-------|-----|-----------------------|-----------------------|-----------------------|-----------------------|-----------------------|-----------------------|-----------------------|
|            |                           | Local (CH)             | CBS    | ATCC            | IMI    | WPC    | M.Gallegly           | Other | 60S | β-TUB | EF1a | Enolase                   | HSP90 | 28S | TigA                  |                       |                       |                       |                       |                       |                       |
| 2e         | <i>P. taxon aquatilis</i> | 38J5                   |        | MYA-4577        |        |        |                      |       |     |       |      |                           |       |     | KX250929              | KX250930              | KX250931              | KX250932              | KX250933              | KX250934              | KX250935              |
| 3          | <i>P. ilicis</i>          | 23A7                   |        | 56615, MYA-3897 | P3939  | p113   | Ho 18.1              |       |     |       |      |                           |       |     | KX250936              | KX250937              | KX250938              | KX250939              | KX250940              | KX250941              | KX250942              |
| 3          | <i>P. ilicis</i>          | 34D6                   |        |                 |        |        |                      |       |     |       |      |                           |       |     | KX250943              | KX250944              | KX250945              | KX250946              | KX250947              | KX250948              | KX250949              |
| 3          | <i>P. ilicis</i>          | 62A7                   | 114348 |                 |        |        | PD 91/595            |       |     |       |      |                           |       |     | KX250950              | KX250951              | KX250952              | KX250953              | KX250954              | KX250955              | KX250956              |
| 3          | <i>P. nemorosa</i>        | 28J3                   |        | MYA-4061        |        | p141   | SPT42.51             |       |     |       |      |                           |       |     | KX250957              | KX250958              | KX250959              | KX250960              | KX250961              | KX250962              | KX250963              |
| 3          | <i>P. nemorosa</i>        | 41C4                   |        | MYA-2948        |        | p320   | Hansen P13           |       |     |       |      |                           |       |     | KX250964              | KX250965              | KX250966              | KX250967              | KX250968              | KX250969              | KX250970              |
| 3          | <i>P. pluvialis</i>       | 60B3                   |        | MYA-4930        |        |        | Hansen LC-9.2-020508 |       |     |       |      |                           |       |     | KX250971              | KX250972              | KX250973              | KX250974              | KX250975              | KX250976              | KX250977              |
| 3          | <i>P. pseudosyringae</i>  | 30A8                   | 111772 | MYA-4222        |        | p284   | PSEU 6               |       |     |       |      |                           |       |     | KX250978              | KX250979              | KX250980              | KX250981              | KX250982              | KX250983              | KX250984              |
| 3          | <i>P. pseudosyringae</i>  | 30B1                   |        |                 |        | Pp285  | PSEU 9               |       |     |       |      |                           |       |     | KX250985              | KX250986              | KX250987              | KX250988              | KX250989              | KX250990              | KX250991              |
| 3          | <i>P. psychrophila</i>    | 29J5                   | 803.95 |                 |        | p288   | PSY 1                |       |     |       |      |                           |       |     | KX250992              | KX250993              | KX250994              | KX250995              | KX250996              | KX250997              | KX250998              |
| 3          | <i>P. psychrophila</i>    | 29J6                   |        | MYA-4083        |        |        | PSY 2                |       |     |       |      |                           |       |     | KX250999              | KX251000              | KX251001              | KX251002              | KX251003              | KX251004              | KX251005              |
| 4          | <i>P. alticola</i>        | 47G5                   | 121939 |                 |        | P16948 | CMWV19425            |       |     |       |      |                           |       |     | KX251006              | KX251007              | KX251008              | KX251009              | KX251010              | KX251011              | KX251012              |
| 4          | <i>P. arenaria</i>        | 55C2                   | 127950 |                 |        |        | ENA 3                |       |     |       |      |                           |       |     | KX251013              | KX251014              | KX251015              | KX251016              | KX251017              | KX251018              | KX251019              |
| 4          | <i>P. arenaria</i>        | 62B7                   | 125800 |                 |        |        | ENA 1                |       |     |       |      |                           |       |     | KX251020              | KX251021              | KX251022              | KX251023              | KX251024              | KX251025              | KX251026              |
| 4          | <i>P. megakarya</i>       | 22H7                   |        | MYA-4040        |        | p42    | Tsao 203532          |       |     |       |      |                           |       |     | KX251027              | KX251028              | KX251029              | KX251030              | KX251031              | KX251032              | KX251033              |
| 4          | <i>P. megakarya</i>       | 61J5                   | 238.83 | 42100           | 202077 |        |                      |       |     |       |      |                           |       |     | KX251034              | KX251035              | KX251036              | KX251037              | KX251038              | KX251039              | KX251040              |
| 4          | <i>P. megakarya</i>       | 61J6                   | 239.83 | 42099           | 106327 |        |                      |       |     |       |      |                           |       |     | KX251041              | KX251042              | KX251043              | KX251044              | KX251045              | KX251046              | KX251047              |
| 4          | <i>P. palmivora</i>       | 22G8                   |        | MYA-4039        |        | P10213 | p65                  |       |     |       |      |                           |       |     | KX251048              | KX251049              | KX251050              | KX251051              | KX251052              | KX251053              | KX251054              |
| 4          | <i>P. palmivora</i>       | 22G9                   |        | MYA-4038        |        | p26    | Tsao 489             |       |     |       |      |                           |       |     | KX251055              | KX251056              | KX251057              | KX251058              | KX251059              | KX251060              | KX251061              |
| 4          | <i>P. quercetorum</i>     | 15C7                   |        |                 |        |        | Jeffers AF.018       |       |     |       |      |                           |       |     | KX251062              | KX251063              | KX251064              | KX251065              | KX251066              | KX251067              | KX251068              |
| 4          | <i>P. quercetorum</i>     | 15C8                   |        |                 |        |        | Jeffers AF.018       |       |     |       |      |                           |       |     | KX251069              | KX251070              | KX251071              | KX251072              | KX251073              | KX251074              | KX251075              |
| 4          | <i>P. quercina</i>        | 30A4                   | 783.95 |                 |        |        | QUE 1                |       |     |       |      |                           |       |     | KX252647              | KX252648              | KX252649              | KX252650              | KX252651              | KX252652              | KX252653              |
| 4          | <i>P. quercina</i>        | 30A5                   | 784.95 | MYA-4084        |        |        | QUE 3                |       |     |       |      |                           |       |     | KX252654              | KX252655              | KX252656              | KX252657              | KX252658              | KX252659              | KX252660              |
| 4          | <i>P. quercina</i>        | 30A7                   |        |                 |        |        | QUE 164              |       |     |       |      |                           |       |     | KX252661              | KX252662              | KX252663              | KX252664              | KX252665              | KX252666              | KX252667              |
| 4          | <i>P. sp. ohioensis</i>   |                        |        |                 |        | P16050 | Balci ST18-37        |       |     |       |      |                           |       |     | Phytophthora Database |
| 5          | <i>P. agathidicida</i>    | 67D5                   |        |                 |        |        | ICMP 17027           |       |     |       |      |                           |       |     | KX251076              | KX251077              | KX251078              | KX251079              | KX251080              | KX251081              | KX251082              |
| 5          | <i>P. castaneae</i>       | 22H6                   |        | MYA-4060        |        | p45    | Tsao P990            |       |     |       |      |                           |       |     | KX251083              | KX251084              | KX251085              | KX251086              | KX251087              | KX251088              | KX251089              |
| 5          | <i>P. castaneae</i>       | 30E7                   |        |                 |        |        | Ho FFM 10-5C         |       |     |       |      |                           |       |     | KX251090              | KX251091              | KX251092              | KX251093              | KX251094              | KX251095              | KX251096              |
| 5          | <i>P. castaneae</i>       | 61J7                   | 587.85 | 36818           | 325914 |        | L-2A                 |       |     |       |      |                           |       |     | KX251097              | KX251098              | KX251099              | KX251100              | KX251101              | KX251102              | KX251103              |
| 5          | <i>P. cocolis</i>         | 67D6                   |        |                 |        |        | ICMP 16948           |       |     |       |      |                           |       |     | KX251104              | KX251105              | KX251106              | KX251107              | KX251108              | KX251109              | KX251110              |
| 5          | <i>P. heveae</i>          | 22J1                   |        |                 | 180616 |        |                      |       |     |       |      |                           |       |     | KX251111              | KX251112              | KX251113              | KX251114              | KX251115              | KX251116              | KX251117              |
| 5          | <i>P. heveae</i>          | 22J2                   |        | 16701, MYA-3895 |        | p17    |                      |       |     |       |      |                           |       |     | KX251118              | KX251119              | KX251120              | KX251121              | KX251122              | KX251123              | KX251124              |
| 6a         | <i>P. gemini</i>          | 46H1                   | 123382 |                 |        |        | PD 99/13471          |       |     |       |      |                           |       |     | KX251125              | KX251126              | KX251127              | KX251128              | KX251129              | KX251130              | KX251131              |
| 6a         | <i>P. gemini</i>          | 46H2                   | 123383 |                 |        |        | PD 99/13472          |       |     |       |      |                           |       |     | KX251132              | KX251133              | KX251134              | KX251135              | KX251136              | KX251137              | KX251138              |

Supplementary Table 1. (Continued).

| (Sub)clade | Species                  | Isolate identification |        |                 |        |        |             |                             |          |          |          | GenBank accession numbers |          |          |          |  |  |  |  |  |  |
|------------|--------------------------|------------------------|--------|-----------------|--------|--------|-------------|-----------------------------|----------|----------|----------|---------------------------|----------|----------|----------|--|--|--|--|--|--|
|            |                          | Local (CH)             | CBS    | ATCC            | IMI    | WPC    | M. Gallegly | Other                       | 60S      | β-TUB    | EF1a     | Enolase                   | HSP90    | 28S      | TigA     |  |  |  |  |  |  |
| 6a         | <i>P. humicola</i>       | 32F8                   | 200.81 | 52179, MYA-4080 |        | P3826  | p198        |                             | KX251139 | KX251140 | KX251141 | KX251142                  | KX251143 | KX251144 | KX251145 |  |  |  |  |  |  |
| 6a         | <i>P. humicola</i>       | 32F9                   |        |                 |        | P6702  | p199        |                             | KX251146 | KX251147 | KX251148 | KX251149                  | KX251150 | KX251151 | KX251152 |  |  |  |  |  |  |
| 6a         | <i>P. inundata</i>       | 30J3                   |        |                 | 390121 |        | p291        | Brasier P894                | KX251153 | KX251154 | KX251155 | KX251156                  | KX251157 | KX251158 | KX251159 |  |  |  |  |  |  |
| 6a         | <i>P. inundata</i>       | 30J4                   |        |                 | 389751 |        | p298        | Brasier P246B               | KX251160 | KX251161 | KX251162 | KX251163                  | KX251164 | KX251165 | KX251166 |  |  |  |  |  |  |
| 6a         | <i>P. inundata</i>       |                        |        |                 |        | P8619  |             | PH-15-21-93                 | EU080202 | EU080203 | EU080204 | EU080205                  | EU080206 | EU080207 | EU080208 |  |  |  |  |  |  |
| 6a         | <i>P. rosacearum</i>     | 22J9                   |        | MYA-3662        |        |        | p82         | Hansen 62                   | KX251431 | KX251432 | KX251433 | KX251434                  | KX251435 | KX251436 | KX251437 |  |  |  |  |  |  |
| 6a         | <i>P. rosacearum</i>     | 41C1                   |        |                 |        |        | p321        | Hansen 63                   | KX251438 | KX251439 | KX251440 | KX251441                  | KX251442 | KX251443 | KX251444 |  |  |  |  |  |  |
| 6a         | <i>P. rosacearum</i>     | 47J1                   |        | MYA-4456        |        |        |             | Hansen 52, Mircetich 20-3-9 | KX251445 | KX251446 | KX251447 | KX251448                  | KX251449 | KX251450 | KX251451 |  |  |  |  |  |  |
| 6a         | <i>P. sp. 48H2</i>       | 48H2                   |        |                 |        |        |             |                             | KX251480 | KX251481 | KX251482 | KX251483                  | KX251484 | KX251485 | KX251486 |  |  |  |  |  |  |
| 6a         | <i>P. sp. 62C9</i>       | 62C9                   |        |                 |        |        |             | Jung TW65                   | KX251487 | KX251488 | KX251489 | KX251490                  | KX251491 | KX251492 | KX251493 |  |  |  |  |  |  |
| 6a         | <i>P. sp. personii</i>   |                        |        |                 |        | P11555 |             | Abad P51.8 P38X-S           | EU080312 | EU080313 | EU080314 | EU080315                  | EU080316 | EU080317 | EU080318 |  |  |  |  |  |  |
| 6a         | <i>P. taxon walnut</i>   | 40A7                   |        |                 |        |        |             |                             | KX251452 | KX251453 | KX251454 | KX251455                  | KX251456 | KX251457 | KX251458 |  |  |  |  |  |  |
| 6a         | <i>P. taxon walnut</i>   | 43G1                   |        |                 |        |        |             |                             | KX251459 | KX251460 | KX251461 | KX251462                  | KX251463 | KX251464 | KX251465 |  |  |  |  |  |  |
| 6b         | <i>P. amnicola</i>       | 61G6                   | 131652 |                 |        |        |             | DH228                       | KX251167 | KX251168 | KX251169 | KX251170                  | KX251171 | KX251172 | KX251173 |  |  |  |  |  |  |
| 6b         | <i>P. amnicola</i>       | 62C5                   | 133867 |                 |        |        |             | PD 01205336971              | KX251174 | KX251175 | KX251176 | KX251177                  | KX251178 | KX251179 | KX251180 |  |  |  |  |  |  |
| 6b         | <i>P. bilorbang</i>      | 61G8                   | 131653 |                 |        |        |             | SA262                       | KX251181 | KX251182 | n.a.     | KX251183                  | KX251184 | KX251185 | KX251186 |  |  |  |  |  |  |
| 6b         | <i>P. borealis</i>       | 60B2                   | 132023 | MYA-4881        |        |        |             | AKWA58.1-0708               | KX251187 | KX251188 | KX251189 | KX251190                  | KX251191 | KX251192 | KX251193 |  |  |  |  |  |  |
| 6b         | <i>P. crassamura</i>     | 66C9                   |        |                 |        |        |             | PH094                       | KX251194 | KX251195 | KX251196 | KX251197                  | KX251198 | KX251199 | KX251200 |  |  |  |  |  |  |
| 6b         | <i>P. crassamura</i>     | 66D1                   | 140357 |                 |        |        |             | PH138                       | KX251201 | KX251202 | KX251203 | KX251204                  | KX251205 | KX251206 | KX251207 |  |  |  |  |  |  |
| 6b         | <i>P. fluvialis</i>      | 55B6                   | 129424 |                 |        |        |             |                             | KX251208 | KX251209 | KX251210 | KX251211                  | KX251212 | KX251213 | KX251214 |  |  |  |  |  |  |
| 6b         | <i>P. gibbosa</i>        | 55B7                   |        |                 |        |        |             | VHS22007                    | KX251215 | KX251216 | KX251217 | KX251218                  | KX251219 | KX251220 | KX251221 |  |  |  |  |  |  |
| 6b         | <i>P. gibbosa</i>        | 62B8                   | 127951 |                 |        |        |             | VHS21998                    | KX251222 | KX251223 | KX251224 | KX251225                  | KX251226 | KX251227 | KX251228 |  |  |  |  |  |  |
| 6b         | <i>P. gonapodyides</i>   | 21J5                   |        | 46726           |        |        |             |                             | KX251229 | KX251230 | KX251231 | KX251232                  | KX251233 | KX251234 | KX251235 |  |  |  |  |  |  |
| 6b         | <i>P. gonapodyides</i>   | 34A8                   | 554.67 | 60351           |        | P6872  | p117        |                             | KX251236 | KX251237 | KX251238 | KX251239                  | KX251240 | KX251241 | KX251242 |  |  |  |  |  |  |
| 6b         | <i>P. gregata</i>        | 55B8                   |        |                 |        |        |             | VHS21992                    | KX251243 | KX251244 | KX251245 | KX251246                  | KX251247 | KX251248 | KX251249 |  |  |  |  |  |  |
| 6b         | <i>P. gregata</i>        | 62B9                   | 127952 |                 |        |        |             | VHS21962                    | KX251250 | KX251251 | KX251252 | KX251253                  | KX251254 | KX251255 | KX251256 |  |  |  |  |  |  |
| 6b         | <i>P. lacustris</i>      | 61D6                   |        |                 |        |        |             | UKN-Ph1                     | KX251257 | KX251258 | KX251259 | KX251260                  | KX251261 | KX251262 | KX251263 |  |  |  |  |  |  |
| 6b         | <i>P. lacustris</i>      | 61D8                   |        |                 |        |        |             | UKN-Ph15                    | KX251264 | KX251265 | KX251266 | KX251267                  | KX251268 | KX251269 | KX251270 |  |  |  |  |  |  |
| 6b         | <i>P. lacustris</i>      | 61E1                   |        |                 |        |        |             | UKN-Ph33                    | KX251271 | KX251272 | KX251273 | KX251274                  | KX251275 | KX251276 | KX251277 |  |  |  |  |  |  |
| 6b         | <i>P. lacustris</i>      |                        |        |                 | 389725 | P10337 |             | PIPHAS-P566                 | EU080530 | EU080531 | EU080532 | EU080533                  | EU080534 | EU080535 | EU080536 |  |  |  |  |  |  |
| 6b         | <i>P. litoralis</i>      | 55B9                   | 127953 |                 |        |        |             | VHS 20763                   | KX251278 | KX251279 | KX251280 | KX251281                  | KX251282 | KX251283 | KX251284 |  |  |  |  |  |  |
| 6b         | <i>P. megasperma</i>     | 62C7                   | 402.72 | 58817           | 32035  | P3599  |             |                             | KX251285 | KX251286 | KX251287 | KX251288                  | KX251289 | KX251290 | n.a.     |  |  |  |  |  |  |
| 6b         | <i>P. mississippiiae</i> | 57J1                   |        |                 |        |        |             |                             | KX251291 | KX251292 | KX251293 | KX251294                  | KX251295 | KX251296 | KX251297 |  |  |  |  |  |  |
| 6b         | <i>P. mississippiiae</i> | 57J2                   |        |                 |        |        |             |                             | KX251298 | KX251299 | KX251300 | KX251301                  | KX251302 | KX251303 | KX251304 |  |  |  |  |  |  |
| 6b         | <i>P. mississippiiae</i> | 57J3                   |        | MYA-4946        |        |        |             |                             | KX251305 | KX251306 | KX251307 | KX251308                  | KX251309 | KX251310 | KX251311 |  |  |  |  |  |  |

Supplementary Table 1. (Continued).

| (Sub)clade | Species                       | Isolate identification |          |          |        | GenBank accession numbers |                       |       |          |          |          |          |          |          |          |
|------------|-------------------------------|------------------------|----------|----------|--------|---------------------------|-----------------------|-------|----------|----------|----------|----------|----------|----------|----------|
|            |                               | Local (CH)             | CBS      | ATCC     | IMI    | WPC                       | M. Gallegly           | Other | 60S      | β-TUB    | EF1a     | Enolase  | HSP90    | 28S      | TigA     |
| 6b         | <i>P. mississippiae</i>       | 57J4                   |          |          |        |                           |                       |       | KX251312 | KX251313 | KX251314 | KX251315 | KX251316 | KX251317 | KX251318 |
| 6b         | <i>P. ornamentata</i>         | 66D2                   | 140647   |          |        |                           | PH152                 |       | KX251319 | KX251320 | KX251321 | KX251322 | KX251323 | KX251324 | KX251325 |
| 6b         | <i>P. ornamentata</i>         | 66D3                   |          |          |        |                           | PH153                 |       | KX251326 | KX251327 | KX251328 | KX251329 | KX251330 | KX251331 | KX251332 |
| 6b         | <i>P. pinifolia</i>           | 47H1                   | 122924   |          |        |                           | CMW26668              |       | KX251333 | KX251334 | KX251335 | KX251336 | KX251337 | KX251338 | KX251339 |
| 6b         | <i>P. pinifolia</i>           | 47H2                   | 122922   |          |        |                           | CMW26669              |       | KX251340 | KX251341 | KX251342 | KX251343 | KX251344 | KX251345 | KX251346 |
| 6b         | <i>P. riparia</i>             | 60B1                   | 132024   | MYA-4882 |        |                           | VI 3-100B9F           |       | KX251347 | KX251348 | KX251349 | KX251350 | KX251351 | KX251352 | KX251353 |
| 6b         | <i>P. thermophila</i>         | 55C1                   | 127954   |          |        |                           | VHS13530              |       | KX251354 | KX251355 | KX251356 | KX251357 | KX251358 | KX251359 | KX251360 |
| 6b         | <i>P. xstagnum</i>            | 36H8                   |          |          |        |                           |                       |       | KX251361 | KX251362 | KX251363 | KX251364 | KX251365 | KX251366 | KX251367 |
| 6b         | <i>P. xstagnum</i>            | 36J7                   |          |          |        |                           |                       |       | KX251368 | KX251369 | KX251370 | KX251371 | KX251372 | KX251373 | KX251374 |
| 6b         | <i>P. xstagnum</i>            | 43F3                   |          | MYA-4926 |        |                           |                       |       | KX251375 | KX251376 | KX251377 | KX251378 | KX251379 | KX251380 | KX251381 |
| 6b         | <i>P. xstagnum</i>            | 44F9                   |          |          |        |                           |                       |       | KX251382 | KX251383 | KX251384 | KX251385 | KX251386 | KX251387 | KX251388 |
| 6b         | <i>P. sp. 26E1</i>            | 26E1                   |          |          |        |                           |                       | p116  | KX251389 | KX251390 | KX251391 | KX251392 | KX251393 | KX251394 | KX251395 |
| 6b         | <i>P. sp. canalensis</i>      |                        |          |          | P10456 |                           |                       |       | EU079569 | EU079570 | EU079571 | EU079572 | EU079573 | EU079574 | n.a.     |
| 6b         | <i>P. sp. delaware</i>        | 63H4                   |          |          |        |                           | Gregory HS2B          |       | KX251396 | KX251397 | KX251398 | KX251399 | KX251400 | KX251401 | KX251402 |
| 6b         | <i>P. sp. delaware</i>        | 63H7                   |          |          |        |                           | Gregory HS16A         |       | KX251403 | KX251404 | KX251405 | KX251406 | KX251407 | KX251408 | KX251409 |
| 6b         | <i>P. sp. gregata-like</i>    | 22J5                   | 16698    |          |        | p16                       | N65                   |       | KX251410 | KX251411 | KX251412 | KX251413 | KX251414 | KX251415 | KX251416 |
| 6b         | <i>P. sp. megasperma-like</i> | 23A1                   |          |          |        | p81                       | Hansen 61             |       | KX251417 | KX251418 | KX251419 | KX251420 | KX251421 | KX251422 | KX251423 |
| 6b         | <i>P. sp. megasperma-like</i> | 23A3                   | MYA-3660 |          |        | p79                       | Hansen 50             |       | KX251424 | KX251425 | KX251426 | KX251427 | KX251428 | KX251429 | KX251430 |
| 6          | <i>P. asparagi</i>            | 33D7                   |          |          | 384046 |                           | SCR20                 |       | KX251466 | KX251467 | KX251468 | KX251469 | KX251470 | KX251471 | KX251472 |
| 6          | <i>P. asparagi</i>            | 62C4                   | 132095   | MYA-4826 |        |                           | SP326                 |       | KX251473 | KX251474 | KX251475 | KX251476 | KX251477 | KX251478 | KX251479 |
| 6          | <i>P. sp. sulawesiensis</i>   |                        |          |          |        | P6306                     |                       |       | EU080345 | n.a.     | EU080346 | EU080347 | EU080348 | EU080349 | EU080350 |
| 7a         | <i>P. attenuata</i>           | 67C5                   |          |          |        |                           | Jung TW129            |       | KX251609 | KX251610 | KX251611 | KX251612 | KX251613 | KX251614 | KX251615 |
| 7a         | <i>P. europaea</i>            | 30A3                   |          |          |        |                           | Jung IFB-EUR 4        |       | KX251508 | KX251509 | KX251510 | KX251511 | KX251512 | KX251513 | KX251514 |
| 7a         | <i>P. europaea</i>            | 34C2                   |          |          |        |                           | Halmshlagler Amance 1 |       | KX251515 | KX251516 | KX251517 | KX251518 | KX251519 | KX251520 | KX251521 |
| 7a         | <i>P. europaea</i>            | 62A2                   | 109049   |          |        |                           | Jung IFB-EUR 2        |       | KX251522 | KX251523 | KX251524 | KX251525 | KX251526 | KX251527 | KX251528 |
| 7a         | <i>P. flexuosa</i>            | 67C3                   |          |          |        |                           | Jung TW78             |       | KX251616 | KX251617 | KX251618 | KX251619 | KX251620 | KX251621 | KX251622 |
| 7a         | <i>P. formosa</i>             | 67C4                   |          |          |        |                           | Jung TW107            |       | KX251623 | KX251624 | KX251625 | KX251626 | KX251627 | KX251628 | KX251629 |
| 7a         | <i>P. fragariae</i>           | 22G6                   | 11374    |          |        | p114                      |                       |       | KX251529 | KX251530 | KX251531 | KX251532 | KX251533 | KX251534 | KX251535 |
| 7a         | <i>P. fragariae</i>           | 30C5                   |          |          | 181417 | P6231                     |                       |       | KX251536 | KX251537 | KX251538 | KX251539 | KX251540 | KX251541 | KX251542 |
| 7a         | <i>P. fragariae</i>           | 61J3                   | 20946    |          |        |                           |                       |       | KX251543 | KX251544 | KX251545 | KX251546 | KX251547 | KX251548 | KX251549 |
| 7a         | <i>P. intricata</i>           | 67B9                   |          |          |        | p186                      | Jung TW16m4, TW259    |       | KX251630 | KX251631 | KX251632 | KX251633 | KX251634 | KX251635 | KX251636 |
| 7a         | <i>P. rubi</i>                | 30D7                   |          |          |        |                           | Tooley 397            |       | KX251550 | KX251551 | KX251552 | KX251553 | KX251554 | KX251555 | KX251556 |
| 7a         | <i>P. rubi</i>                | 41D5                   |          |          |        | p389                      | Herrero 9255          |       | KX251557 | KX251558 | KX251559 | KX251560 | KX251561 | KX251562 | KX251563 |
| 7a         | <i>P. rubi</i>                | 46C7                   | 90442    |          |        |                           | R49, CH21             |       | KX251564 | KX251565 | KX251566 | KX251567 | KX251568 | KX251569 | KX251570 |
| 7a         | <i>P. uliginosa</i>           | 62A3                   | 109054   |          | P10413 |                           | Jung IFB-ULI 1        |       | EU080011 | EU080012 | EU080013 | KX251571 | KX251572 | EU080015 | KX251573 |

Supplementary Table 1. (Continued).

| (Sub)clade | Species                  | Isolate identification |        |                 |        |        |             |                               |          |          |          | GenBank accession numbers |          |          |          |  |
|------------|--------------------------|------------------------|--------|-----------------|--------|--------|-------------|-------------------------------|----------|----------|----------|---------------------------|----------|----------|----------|--|
|            |                          | Local (CH)             | CBS    | ATCC            | IMI    | WPC    | M. Gallegly | Other                         | 60S      | β-TUB    | EF1a     | Enlase                    | HSP90    | 28S      | TigA     |  |
| 7a         | <i>P. uliginosa</i>      | 62A4                   | 109055 |                 |        | P10328 |             | Jung IFB-ULI 2                | EU079692 | EU079693 | EU079694 | EU079695                  | EU079696 | EU079697 | EU079698 |  |
| 7a         | <i>P. xalni</i>          | 32J6                   | 392317 | MYA-4081        |        |        | p205        | P834                          | KX251574 | KX251575 | KX251576 | KX251577                  | KX251578 | KX251579 | KX251580 |  |
| 7a         | <i>P. xalni</i>          | 32J7                   | 392318 |                 |        |        | p206        | P883                          | KX251581 | KX251582 | KX251583 | KX251584                  | KX251585 | KX251586 | KX251587 |  |
| 7a         | <i>P. xalni</i>          | 47A7                   |        |                 | 392314 |        |             | P772                          | KX251588 | KX251589 | KX251590 | KX251591                  | KX251592 | KX251593 | KX251594 |  |
| 7a         | <i>P. xalni</i>          | 47A8                   |        |                 |        |        | p64         | WMV20010932                   | KX251595 | KX251596 | KX251597 | KX251598                  | KX251599 | KX251600 | KX251601 |  |
| 7a         | <i>P. xcambivora</i>     | 22F6                   |        | 46719, MYA-4076 |        |        |             | Tsao P592                     | KX251494 | KX251495 | KX251496 | KX251497                  | KX251498 | KX251499 | KX251500 |  |
| 7a         | <i>P. xcambivora</i>     | 26F8                   |        | MYA-4075        |        |        | p38         | NY216                         | KX251501 | KX251502 | KX251503 | KX251504                  | KX251505 | KX251506 | KX251507 |  |
| 7a         | <i>P. xheterohybrida</i> | 67C1                   |        |                 |        |        |             | Jung TW30                     | KX251637 | KX251638 | KX251639 | KX251640                  | KX251641 | KX251642 | KX251643 |  |
| 7a         | <i>P. xincrassata</i>    | 67C2                   |        |                 |        |        |             | Jung TW43m5                   | KX251644 | KX251645 | KX251646 | KX251647                  | KX251648 | KX251649 | KX251650 |  |
| 7a         | <i>P. sp. europaeaSW</i> | 33F7                   |        |                 |        |        | p229        | BM4/6 (Balci)                 | KX251602 | KX251603 | KX251604 | KX251605                  | KX251606 | KX251607 | KX251608 |  |
| 7b         | <i>P. asiatica</i>       | 45G1                   |        | 90455           |        |        | p352        | Ho Lu625                      | KX251651 | KX251652 | KX251653 | KX251654                  | KX251655 | KX251656 | KX251657 |  |
| 7b         | <i>P. asiatica</i>       | 46C6                   |        | 56194           |        |        | p388        | Ho 523 (P31)                  | KX251658 | KX251659 | KX251660 | KX251661                  | KX251662 | KX251663 | KX251664 |  |
| 7b         | <i>P. asiatica</i>       | 61H3                   | 133347 |                 |        |        |             | NBRC109140, Tokui-1           | KX251665 | KX251666 | KX251667 | KX251668                  | KX251669 | KX251670 | KX251671 |  |
| 7b         | <i>P. cajani</i>         | 33D9                   |        |                 |        |        | p214        | DCSCR231                      | KX251672 | KX251673 | KX251674 | KX251675                  | KX251676 | KX251677 | KX251678 |  |
| 7b         | <i>P. cajani</i>         | 45F6                   |        | 44389           |        |        | p348        | Erwin P4                      | KX251679 | KX251680 | KX251681 | KX251682                  | KX251683 | KX251684 | KX251685 |  |
| 7b         | <i>P. cajani</i>         | 45F7                   |        | 44388           |        |        | p349        | Erwin P2                      | KX251686 | KX251687 | KX251688 | KX251689                  | KX251690 | KX251691 | KX251692 |  |
| 7b         | <i>P. melonis</i>        | 32F6                   |        | MYA-4079        |        |        | p196        |                               | KX251693 | KX251694 | KX251695 | KX251696                  | KX251697 | KX251698 | KX251699 |  |
| 7b         | <i>P. melonis</i>        | 41B4                   |        |                 |        |        | p318        | Banhashemi<br>PH.6.42.92      | KX251700 | KX251701 | KX251702 | KX251703                  | KX251704 | KX251705 | KX251706 |  |
| 7b         | <i>P. melonis</i>        | 45F3                   | 582,69 | 52854           |        |        |             | Ho H513                       | KX251707 | KX251708 | KX251709 | KX251710                  | KX251711 | KX251712 | KX251713 |  |
| 7b         | <i>P. niederhauserii</i> | 01D5                   |        |                 |        |        | p312        |                               | KX251714 | KX251715 | KX251716 | KX251717                  | KX251718 | KX251719 | KX251720 |  |
| 7b         | <i>P. niederhauserii</i> | 23J6                   |        | MYA-4163        |        |        | p57         | Ribeiro Israel 2              | KX251721 | KX251722 | KX251723 | KX251724                  | KX251725 | KX251726 | KX251727 |  |
| 7b         | <i>P. niederhauserii</i> | 31E7                   |        |                 |        |        | p169        | Abad 5212                     | KX251728 | KX251729 | KX251730 | KX251731                  | KX251732 | KX251733 | KX251734 |  |
| 7b         | <i>P. pisi</i>           | 60A4                   |        |                 |        |        |             | Heyman 97603                  | KX251735 | KX251736 | KX251737 | KX251738                  | KX251739 | KX251740 | KX251741 |  |
| 7b         | <i>P. pisi</i>           | 60A5                   |        |                 |        |        |             | Heyman 2150                   | KX251742 | KX251743 | KX251744 | KX251745                  | KX251746 | KX251747 | n.a.     |  |
| 7b         | <i>P. pistaciae</i>      | 33D6                   |        | MYA-4082        | 386658 |        | p216        | DCSCR533, S16                 | KX251748 | KX251749 | KX251750 | KX251751                  | KX251752 | KX251753 | KX251754 |  |
| 7b         | <i>P. pistaciae</i>      | 41A9                   |        |                 |        |        | p314        | Banhashemi<br>PH.6.44.93      | KX251755 | KX251756 | KX251757 | KX251758                  | KX251759 | KX251760 | KX251761 |  |
| 7b         | <i>P. sojae</i>          | 22D8                   | 312.62 | 16705, MYA-3899 | 131375 |        | p19         | N9                            | KX251762 | KX251763 | KX251764 | KX251765                  | KX251766 | KX251767 | KX251768 |  |
| 7b         | <i>P. sojae</i>          | 28F9                   |        |                 |        |        | p236        | Tyler P6497                   | KX251769 | KX251770 | KX251771 | KX251772                  | KX251773 | KX251774 | KX251775 |  |
| 7b         | <i>P. vignae</i>         | 45G6                   |        | 46735           |        |        | p357        | Purs 901, Zentmeyer<br>P.606. | KX251776 | KX251777 | KX251778 | KX251779                  | KX251780 | KX251781 | KX251782 |  |
| 7b         | <i>P. vignae</i>         | 45G9                   |        | 64832           | 316196 | P3420  | p379        |                               | KX251783 | KX251784 | KX251785 | KX251786                  | KX251787 | KX251788 | KX251789 |  |
| 7b         | <i>P. vignae</i>         | 46C1                   | 112,76 | 64129           |        |        | p380        |                               | KX251790 | KX251791 | KX251792 | KX251793                  | KX251794 | KX251795 | KX251796 |  |
| 7c         | <i>P. cinnamomi</i>      | 23B1                   |        | 15400, MYA-4057 |        |        | p10         | N311                          | KX251797 | KX251798 | KX251799 | KX251800                  | KX251801 | KX251802 | KX251803 |  |
| 7c         | <i>P. cinnamomi</i>      | 23B2                   |        | 15401, MYA-4058 |        |        | p11         | N33                           | KX251804 | KX251805 | KX251806 | KX251807                  | KX251808 | KX251809 | KX251810 |  |

Supplementary Table 1. (Continued).

| (Sub)clade | Species                      | Isolate identification |        |                 |        |        | GenBank accession numbers               |       |          |          |          |          |          |          |          |  |
|------------|------------------------------|------------------------|--------|-----------------|--------|--------|-----------------------------------------|-------|----------|----------|----------|----------|----------|----------|----------|--|
|            |                              | Local (CH)             | CBS    | ATCC            | IMI    | WPC    | M.Gallegly                              | Other | 60S      | β-TUB    | EF1a     | Enolase  | HSP90    | 28S      | TigA     |  |
| 7c         | <i>P. cinnamomi</i>          | 61J1                   | 144,22 | 46671           | 22938  | P2110  |                                         |       | KX251811 | KX251812 | KX251813 | KX251814 | KX251815 | KX251816 | KX251817 |  |
| 7c         | <i>P. parvispora</i>         | 30G9                   |        | MYA-4078        |        | p178   | Verres BBA65507                         |       | KX251818 | KX251819 | KX251820 | KX251821 | KX251822 | KX251823 | KX251824 |  |
| 7c         | <i>P. parvispora</i>         | 46F6                   |        |                 |        |        | Verres BBA65508                         |       | KX251825 | KX251826 | KX251827 | KX251828 | KX251829 | KX251830 | KX251831 |  |
| 7c         | <i>P. parvispora</i>         | 66C7                   | 132771 |                 |        |        | Scanu PH028                             |       | KX251832 | KX251833 | KX251834 | KX251835 | KX251836 | KX251837 | KX251838 |  |
| 7c         | <i>P. parvispora</i>         | 66C8                   | 132772 |                 |        |        | Scanu PH072                             |       | KX251839 | KX251840 | KX251841 | KX251842 | KX251843 | KX251844 | KX251845 |  |
| 7c         | <i>P. sp. ax</i>             | 46H5                   |        |                 |        |        |                                         |       | KX251846 | KX251847 | KX251848 | KX251849 | KX251850 | KX251851 | KX251852 |  |
| 7d         | <i>P. fragariaefolia</i>     | 61H4                   | 135747 |                 |        |        | NBRC109709,<br>CH05NSU11,<br>MAFF244058 |       | KX251853 | KX251854 | KX251855 | KX251856 | KX251857 | KX251858 | KX251859 |  |
| 7d         | <i>P. nagaii</i>             | 61H5                   | 133248 |                 |        |        | NBRC109131,<br>CH04PHR12,<br>MAFF244047 |       | KX251860 | KX251861 | KX251862 | KX251863 | KX251864 | KX251865 | KX251866 |  |
| 8a         | <i>P. cryptogea</i>          | 61H9                   | 113,19 |                 | 180615 | P1738  | BPIC 1189                               |       | KX251867 | KX251868 | KX251869 | KX251870 | KX251871 | KX251872 | KX251873 |  |
| 8a         | <i>P. drechsleri</i>         | 15E5                   |        |                 |        |        | Jeffers AF.021                          |       | KX251874 | KX251875 | KX251876 | KX251877 | KX251878 | KX251879 | KX251880 |  |
| 8a         | <i>P. drechsleri</i>         | 15E6                   |        |                 |        |        | Jeffers D.200                           |       | KX251881 | KX251882 | KX251883 | KX251884 | KX251885 | KX251886 | KX251887 |  |
| 8a         | <i>P. drechsleri</i>         | 23J5                   | 292,35 | 46724           |        | P1087  |                                         | p41   | KX251888 | KX251889 | KX251890 | KX251891 | KX251892 | KX251893 | KX251894 |  |
| 8a         | <i>P. drechsleri</i>         | 61J2                   | 129,23 |                 | 34684  | P1693  | VKM F-1807                              |       | EU079506 | EU079507 | EU079508 | EU079509 | EU079510 | EU079511 | EU079512 |  |
| 8a         | <i>P. erythrosetica</i>      | 23A4                   |        | MYA-3900        |        |        | S797                                    |       | KX251895 | KX251896 | KX251897 | KX251898 | KX251899 | KX251900 | KX251901 |  |
| 8a         | <i>P. medicaginis</i>        | 28F1                   | 44390  |                 |        | P1057  | Erwin 945-12                            |       | KX251902 | KX251903 | KX251904 | KX251905 | KX251906 | KX251907 | KX251908 |  |
| 8a         | <i>P. medicaginis</i>        | 31E8                   | 52402  |                 |        | P3103  | 63689                                   |       | KX251909 | KX251910 | KX251911 | KX251912 | KX251913 | KX251914 | KX251915 |  |
| 8a         | <i>P. pseudocryptogea</i>    | 45F5                   | 240,30 | 60353, 46734    | 325930 | P10811 | CH89-19, Kamazaki1                      |       | EU080626 | EU080627 | EU080628 | EU080629 | EU080630 | EU080631 | n.a.     |  |
| 8a         | <i>P. richardiae</i>         | 47H3                   |        | MYA-4455        |        |        | Hansen 1819B                            |       | KX251930 | KX251931 | KX251932 | KX251933 | KX251934 | KX251935 | KX251936 |  |
| 8a         | <i>P. sansomeana</i>         | 47H4                   |        |                 |        |        | Hansen 2323                             |       | KX251937 | KX251938 | KX251939 | KX251940 | KX251941 | KX251942 | KX251943 |  |
| 8a         | <i>P. sansomeana</i>         | 47H5                   |        |                 |        |        | Hansen 92-84                            |       | KX251944 | KX251945 | KX251946 | KX251947 | KX251948 | KX251949 | KX251950 |  |
| 8a         | <i>P. trifolii</i>           | 29B2                   |        | MYA-3901        |        | p142   | Hansen 33                               |       | KX251951 | KX251952 | KX251953 | KX251954 | KX251955 | KX251956 | KX251957 |  |
| 8a         | <i>P. trifolii</i>           | 62A9                   | 117687 |                 |        |        | Hansen 32                               |       | KX251958 | KX251959 | KX251960 | KX251961 | KX251962 | KX251963 | KX251964 |  |
| 8a         | <i>P. aff. cryptogea</i>     | 22G2                   | 308,62 | 15402, MYA-4161 | 325907 | p12    | N57                                     |       | KX251965 | KX251966 | KX251967 | KX251968 | KX251969 | KX251970 | KX251971 |  |
| 8a         | <i>P. aff. erythrosetica</i> | 22J4                   |        | MYA-4041        |        | p50    | S720                                    |       | KX251972 | KX251973 | KX251974 | KX251975 | KX251976 | KX251977 | KX251978 |  |
| 8a         | <i>P. aff. erythrosetica</i> | 33A1                   |        |                 |        | p207   | Lambert 2004S-1                         |       | KX251979 | KX251980 | KX251981 | KX251982 | KX251983 | KX251984 | KX251985 |  |
| 8a         | <i>P. sp. kelmania</i>       | 24A7                   |        | MYA-4162        |        | p102   |                                         |       | KX251986 | KX251987 | KX251988 | KX251989 | KX251990 | KX251991 | KX251992 |  |
| 8a         | <i>P. sp. kelmania</i>       | 31E4                   |        |                 |        | P10613 | Abad 02-119A, Ph4-1                     |       | EU079605 | EU079606 | EU079607 | EU079608 | EU079609 | EU079610 | EU079611 |  |
| 8b         | <i>P. brassicae</i>          | 29D8                   | 686,95 |                 |        |        | Man in t Veld PD 95/691KX251993         |       | KX251994 | KX251995 | KX251996 | KX251997 | KX251998 | KX251999 | KX251999 |  |



Supplementary Table 1. (Continued).

| (Sub)clade | Species                    | Isolate identification |        |                 |        |                  |                              |       |          |          |          | GenBank accession numbers |          |          |          |  |  |  |
|------------|----------------------------|------------------------|--------|-----------------|--------|------------------|------------------------------|-------|----------|----------|----------|---------------------------|----------|----------|----------|--|--|--|
|            |                            | Local (CH)             | CBS    | ATCC            | IMI    | WPC              | M.Gallegly                   | Other | 60S      | β-TUB    | EF1a     | Enolase                   | HSP90    | 28S      | TigA     |  |  |  |
| 8b         | <i>P. brassicae</i>        | 61J8                   | 179,87 |                 |        | P7517,<br>P19521 |                              |       | KX252000 | KX252001 | KX252002 | KX252003                  | KX252004 | KX252005 | KX252006 |  |  |  |
| 8b         | <i>P. cichorii</i>         | 62A8                   | 115029 |                 |        |                  |                              |       | KX252007 | KX252008 | KX252009 | KX252010                  | KX252011 | KX252012 | KX252013 |  |  |  |
| 8b         | <i>P. dauci</i>            | 61E5                   | 127102 |                 |        |                  | BorfSP370                    |       | KX252014 | KX252015 | KX252016 | KX252017                  | KX252018 | KX252019 | KX252020 |  |  |  |
| 8b         | <i>P. dauci</i>            | 32E5                   |        |                 |        |                  | Breton 134-1                 |       | KX252021 | KX252022 | KX252023 | KX252024                  | KX252025 | KX252026 | KX252027 |  |  |  |
| 8b         | <i>P. dauci</i>            | 32E6                   |        |                 |        | P10728           | Breton 143-1                 |       | KX252028 | KX252029 | KX252030 | KX252031                  | KX252032 | KX252033 | KX252034 |  |  |  |
| 8b         | <i>P. dauci</i>            | 32E7                   |        |                 |        |                  | Breton 148-1                 | p194  | KX252035 | KX252036 | KX252037 | KX252038                  | KX252039 | KX252040 | KX252041 |  |  |  |
| 8b         | <i>P. lactucae</i>         | 61F4                   |        |                 |        |                  | BPIC 1985                    |       | KX252042 | KX252043 | KX252044 | KX252045                  | KX252046 | KX252047 | KX252048 |  |  |  |
| 8b         | <i>P. lactucae</i>         | 61F7                   |        |                 |        |                  | BPIC 1988                    |       | KX252049 | KX252050 | KX252051 | KX252052                  | KX252053 | KX252054 | KX252055 |  |  |  |
| 8b         | <i>P. lactucae</i>         | 61F8                   |        |                 |        |                  | BPIC 1991                    |       | KX252056 | KX252057 | KX252058 | KX252059                  | KX252060 | KX252061 | KX252062 |  |  |  |
| 8b         | <i>P. primulae</i>         | 29E9                   | 620,97 |                 |        |                  | Man in 't Veld PD97/875      | p286  | KX252063 | KX252064 | KX252065 | KX252066                  | KX252067 | KX252068 | KX252069 |  |  |  |
| 8b         | <i>P. primulae</i>         | 29F1                   |        |                 |        |                  | Man in 't Veld<br>PD98/87201 | p287  | KX252070 | KX252071 | KX252072 | KX252073                  | KX252074 | KX252075 | KX252076 |  |  |  |
| 8b         | <i>P. aff. brassicae-2</i> |                        |        |                 |        | P6207            | Bolay #84182                 |       | EU079880 | EU079881 | EU079882 | EU079883                  | EU079884 | EU079885 | EU079886 |  |  |  |
| 8b         | <i>P. aff. cichorii</i>    | 61E3                   | 133815 |                 |        |                  | SCRACE5388                   |       | KX252077 | KX252078 | KX252079 | KX252080                  | KX252081 | KX252082 | KX252083 |  |  |  |
| 8b         | <i>P. sp. 29E7</i>         | 29E7                   |        |                 |        |                  | Man in 't Veld PD92/214      |       | KX252091 | KX252092 | KX252093 | KX252094                  | KX252095 | KX252096 | KX252097 |  |  |  |
| 8b         | <i>P. taxon castitis</i>   | 61E7                   | 131246 |                 |        |                  | CH112                        |       | KX252098 | KX252099 | KX252100 | KX252101                  | KX252102 | KX252103 | KX252104 |  |  |  |
| 8b         | <i>P. taxon parsley</i>    | 61G1                   |        |                 |        |                  | BPIC 2584                    |       | KX252105 | KX252106 | KX252107 | KX252108                  | KX252109 | KX252110 | KX252111 |  |  |  |
| 8c         | <i>P. foliorum</i>         | 49J8                   | 121655 | MYA-3638        |        | P10974           | LT192                        |       | KX252112 | KX252113 | KX252114 | KX252115                  | KX252116 | KX252117 | KX252118 |  |  |  |
| 8c         | <i>P. hibernalis</i>       | 22H1                   | 270,31 | 60352           | 036906 | P6871            | BPIC 1137                    | p115  | KX252119 | KX252120 | KX252121 | KX252122                  | KX252123 | KX252124 | KX252125 |  |  |  |
| 8c         | <i>P. hibernalis</i>       | 32F7                   | 114104 | 56353, MYA-3896 | 134760 | P3822            | Ho H17.1, WA648              | p197  | KX252126 | KX252127 | KX252128 | KX252129                  | KX252130 | KX252131 | KX252132 |  |  |  |
| 8c         | <i>P. lateralis</i>        | 22H9                   |        | MYA-3898        |        |                  | CM P631                      | p51   | KX252133 | KX252134 | KX252135 | KX252136                  | KX252137 | KX252138 | KX252139 |  |  |  |
| 8c         | <i>P. lateralis</i>        | 29A9                   |        | 201856          |        |                  | Hansen 366                   | p128  | KX252140 | KX252141 | KX252142 | KX252143                  | KX252144 | KX252145 | KX252146 |  |  |  |
| 8c         | <i>P. ramorum</i>          | 32G2                   |        |                 |        |                  | Jeffers 04-4398              |       | KX252147 | KX252148 | KX252149 | KX252150                  | KX252151 | KX252152 | KX252153 |  |  |  |
| 8c         | <i>P. ramorum</i>          | 33F2                   |        |                 |        |                  | Garbelotto Pr-102            |       | KX252154 | KX252155 | KX252156 | KX252157                  | KX252158 | KX252159 | KX252160 |  |  |  |
| 8d         | <i>P. austrocedrae</i>     | 41B5                   |        | MYA-4073        |        |                  | Greslebin 195                |       | KX252161 | KX252162 | KX252163 | KX252164                  | KX252165 | KX252166 | KX252167 |  |  |  |
| 8d         | <i>P. austrocedrae</i>     | 41B6                   | 122911 | MYA-4074        |        |                  | Greslebin 203                |       | KX252168 | KX252169 | KX252170 | KX252171                  | KX252172 | KX252173 | KX252174 |  |  |  |
| 8d         | <i>P. obscura</i>          | 60E9                   | 129273 |                 |        |                  | BBA 2/94-11B                 |       | KX252175 | KX252176 | KX252177 | KX252178                  | KX252179 | KX252180 | KX252181 |  |  |  |
| 8d         | <i>P. obscura</i>          | 60F1                   |        |                 |        |                  | JP-09-059 HH-B               |       | KX252182 | KX252183 | KX252184 | KX252185                  | KX252186 | KX252187 | KX252188 |  |  |  |
| 8d         | <i>P. obscura</i>          | 60F2                   |        |                 |        |                  | P-09-011                     |       | KX252189 | KX252190 | KX252191 | KX252192                  | KX252193 | KX252194 | KX252195 |  |  |  |
| 8d         | <i>P. syringae</i>         | 21H9                   |        | 34002           |        | P0649            |                              | p187  | KX252196 | KX252197 | KX252198 | KX252199                  | KX252200 | KX252201 | KX252202 |  |  |  |
| 8d         | <i>P. syringae</i>         | 23A6                   |        | MYA-3659        |        |                  |                              | p35   | KX252203 | KX252204 | KX252205 | KX252206                  | KX252207 | KX252208 | KX252209 |  |  |  |
| 8          | <i>P. stricta</i>          | 58A1                   |        | MYA-4944        |        |                  |                              |       | KX252210 | KX252211 | KX252212 | KX252213                  | KX252214 | KX252215 | KX252216 |  |  |  |
| 8          | <i>P. stricta</i>          | 58A2                   |        |                 |        |                  |                              |       | KX252217 | KX252218 | KX252219 | KX252220                  | KX252221 | KX252222 | KX252223 |  |  |  |
| 8          | <i>P. stricta</i>          | 58A3                   |        |                 |        |                  |                              |       | KX252224 | KX252225 | KX252226 | KX252227                  | KX252228 | KX252229 | KX252230 |  |  |  |
| 8          | <i>P. stricta</i>          | 58A4                   |        |                 |        |                  |                              |       | KX252231 | KX252232 | KX252233 | KX252234                  | KX252235 | KX252236 | KX252237 |  |  |  |

Supplementary Table 1. (Continued).

| (Sub)clade       | Species                    | Isolate identification |        |          |        |       |            |                                                                                  | GenBank accession numbers |          |          |          |          |          |          |
|------------------|----------------------------|------------------------|--------|----------|--------|-------|------------|----------------------------------------------------------------------------------|---------------------------|----------|----------|----------|----------|----------|----------|
|                  |                            | Local (CH)             | CBS    | ATCC     | IMI    | WPC   | M.Gallegly | Other                                                                            | 60S                       | β-TUB    | EF1 a    | Enolase  | HSP90    | 28S      | TigA     |
| 9a (cluster 9a1) | <i>P. aquimorbida</i>      | 40A6                   |        | MYA-4578 |        |       |            |                                                                                  | KX252238                  | KX252239 | KX252240 | KX252241 | KX252242 | KX252243 | KX252244 |
| 9a (cluster 9a1) | <i>P. aquimorbida</i>      | 40E3                   |        |          |        |       |            |                                                                                  | KX252245                  | KX252246 | KX252247 | KX252248 | KX252249 | KX252250 | KX252251 |
| 9a (cluster 9a1) | <i>P. aquimorbida</i>      | 44G9                   |        |          |        |       |            |                                                                                  | KX252252                  | KX252253 | KX252254 | KX252255 | KX252256 | KX252257 | KX252258 |
| 9a (cluster 9a1) | <i>P. chrysanthemii</i>    | 61E9                   |        |          |        |       |            | Kageyama Chr3,<br>NBRC104918                                                     | KX252259                  | KX252260 | KX252261 | KX252262 | KX252263 | KX252264 | KX252265 |
| 9a (cluster 9a1) | <i>P. chrysanthemii</i>    | 61F1                   | 123163 |          |        |       |            | Kageyama GF749,<br>NBRC104917                                                    | KX252266                  | KX252267 | KX252268 | KX252269 | KX252270 | KX252271 | KX252272 |
| 9a (cluster 9a1) | <i>P. hydrogena</i>        | 44G8                   |        |          |        |       |            |                                                                                  | KX252273                  | KX252274 | KX252275 | KX252276 | KX252277 | KX252278 | KX252279 |
| 9a (cluster 9a1) | <i>P. hydrogena</i>        | 46A3                   |        |          |        |       |            | MYA-4919                                                                         | KX252280                  | KX252281 | KX252282 | KX252283 | KX252284 | KX252285 | KX252286 |
| 9a (cluster 9a1) | <i>P. hydrogena</i>        | 46A4                   |        |          |        |       |            |                                                                                  | KX252287                  | KX252288 | KX252289 | KX252290 | KX252291 | KX252292 | KX252293 |
| 9a (cluster 9a1) | <i>P. hydropathica</i>     | 05D1                   |        |          |        |       | p366       |                                                                                  | KX252294                  | KX252295 | KX252296 | KX252297 | KX252298 | KX252299 | KX252300 |
| 9a (cluster 9a1) | <i>P. hydropathica</i>     | 5C11                   |        |          |        |       | p365       |                                                                                  | KX252301                  | KX252302 | KX252303 | KX252304 | KX252305 | KX252306 | KX252307 |
| 9a (cluster 9a1) | <i>P. irrigata</i>         | 04E4                   |        |          |        |       | p335       |                                                                                  | KX252308                  | KX252309 | KX252310 | KX252311 | KX252312 | KX252313 | KX252314 |
| 9a (cluster 9a1) | <i>P. irrigata</i>         | 23J7                   |        |          |        |       | p108       |                                                                                  | KX252315                  | KX252316 | KX252317 | KX252318 | KX252319 | KX252320 | KX252321 |
| 9a (cluster 9a1) | <i>P. irrigata</i>         | 44E4                   |        |          |        |       |            |                                                                                  | KX252322                  | KX252323 | KX252324 | KX252325 | KX252326 | KX252327 | KX252328 |
| 9a (cluster 9a1) | <i>P. macilentosa</i>      | 58A5                   |        |          |        |       |            |                                                                                  | KX252329                  | KX252330 | KX252331 | KX252332 | KX252333 | KX252334 | KX252335 |
| 9a (cluster 9a1) | <i>P. macilentosa</i>      | 58A6                   |        |          |        |       |            |                                                                                  | KX252336                  | KX252337 | KX252338 | KX252339 | KX252340 | KX252341 | KX252342 |
| 9a (cluster 9a1) | <i>P. macilentosa</i>      | 58A7                   |        |          |        |       |            | MYA-4945                                                                         | KX252343                  | KX252344 | KX252345 | KX252346 | KX252347 | KX252348 | KX252349 |
| 9a (cluster 9a1) | <i>P. macilentosa</i>      | 58A8                   |        |          |        |       |            |                                                                                  | KX252350                  | KX252351 | KX252352 | KX252353 | KX252354 | KX252355 | KX252356 |
| 9a (cluster 9a1) | <i>P. parsiana</i>         | 47C3                   |        |          | 395329 |       |            | C25, Banihashemi PH-<br>21-5-08 (X-2-91)                                         | KX252357                  | KX252358 | KX252359 | KX252360 | KX252361 | KX252362 | KX252363 |
| 9a (cluster 9a1) | <i>P. virginiana</i>       | 40A9                   |        |          |        |       |            |                                                                                  | KX252364                  | KX252365 | KX252366 | KX252367 | KX252368 | KX252369 | KX252370 |
| 9a (cluster 9a1) | <i>P. virginiana</i>       | 44G6                   |        |          |        |       |            |                                                                                  | KX252371                  | KX252372 | KX252373 | KX252374 | KX252375 | KX252376 | KX252377 |
| 9a (cluster 9a1) | <i>P. virginiana</i>       | 46A2                   |        |          |        |       |            | MYA-4927                                                                         | KX252378                  | KX252379 | KX252380 | KX252381 | KX252382 | KX252383 | KX252384 |
| 9a (cluster 9a1) | <i>P. aff. parsiana G1</i> | 47C7                   |        |          |        |       |            |                                                                                  | KX252391                  | KX252392 | KX252393 | KX252394 | KX252395 | KX252396 | n.a.     |
| 9a (cluster 9a1) | <i>P. aff. parsiana G1</i> | 47C8                   |        |          |        |       |            |                                                                                  | KX252397                  | KX252398 | KX252399 | KX252400 | KX252401 | KX252402 | n.a.     |
| 9a (cluster 9a1) | <i>P. aff. parsiana G1</i> |                        |        |          | 395328 | P8618 |            | Banihashemi 1<br>Banihashemi 2<br>Banihashemi PH-15-19-<br>92, PH-21-4-08, SUC19 | EU080195                  | EU080196 | EU080197 | EU080198 | EU080199 | EU080200 | EU080201 |
| 9a (cluster 9a1) | <i>P. aff. parsiana G2</i> | 47C5                   |        |          |        |       |            |                                                                                  | KX252433                  | KX252434 | KX252435 | KX252436 | KX252437 | KX252438 | n.a.     |
| 9a (cluster 9a1) | <i>P. aff. parsiana G2</i> | 47C6                   |        |          |        |       |            |                                                                                  | KX252439                  | KX252440 | KX252441 | KX252442 | KX252443 | KX252444 | n.a.     |
| 9a (cluster 9a1) | <i>P. aff. parsiana G3</i> | 47D5                   |        |          |        |       |            |                                                                                  | KX252445                  | KX252446 | KX252447 | KX252448 | KX252449 | KX252450 | n.a.     |
| 9a (cluster 9a1) | <i>P. aff. parsiana G3</i> | 47D8                   |        |          |        |       |            |                                                                                  | KX252463                  | KX252464 | KX252465 | KX252466 | KX252467 | KX252468 | n.a.     |
| 9a (cluster 9a1) | <i>P. aff. parsiana G3</i> | 47E1                   |        |          |        |       |            |                                                                                  | KX252475                  | KX252476 | KX252477 | KX252478 | KX252479 | KX252480 | n.a.     |
| 9a (cluster 9a1) | <i>P. sp. 35G4</i>         | 35G4                   |        |          |        |       |            |                                                                                  | KX252481                  | KX252482 | KX252483 | KX252484 | KX252485 | KX252486 | KX252487 |



Supplementary Table 1. (Continued).

| (Sub)clade | Species                             | Isolate identification |        |          |        |        |            |                                              |          |              |          | GenBank accession numbers |          |          |          |  |  |  |
|------------|-------------------------------------|------------------------|--------|----------|--------|--------|------------|----------------------------------------------|----------|--------------|----------|---------------------------|----------|----------|----------|--|--|--|
|            |                                     | Local (CH)             | CBS    | ATCC     | IMI    | WPC    | M.Gallegly | Other                                        | 60S      | $\beta$ -TUB | EF1a     | Enolase                   | HSP90    | 28S      | TigA     |  |  |  |
| 10         | <i>P. kernoviae</i>                 | 46C8                   |        |          |        | P10956 | p390       | CSL 2286, PRI 712                            | EU080041 | EU080042     | EU080043 | EU080044                  | EU080045 | EU080046 | KX252631 |  |  |  |
| 10         | <i>P. kernoviae</i>                 | 46J6                   |        |          |        | P10681 |            | ICMP 14761, Hill LYN701                      | EU079645 | EU079646     | EU079647 | EU079648                  | EU079649 | EU079650 | EU079651 |  |  |  |
| 10         | <i>P. kernoviae</i>                 | 46J8                   |        |          |        | P10671 |            | ICMP 15082                                   | EU080027 | EU080028     | EU080029 | EU080030                  | EU080031 | EU080032 | KX252632 |  |  |  |
| 10         | <i>P. morindae</i>                  | 62B5                   | 121982 |          |        |        |            | Nelson Ph697, P238, BPI 878721               | KX252633 | KX252634     | KX252635 | KX252636                  | KX252637 | KX252638 | KX252639 |  |  |  |
| 10         | <i>P. sp. boehmeriae-like</i>       | 45F8                   | 357,52 | 60173    | 32199  | P1378  | p350       |                                              | KX252640 | KX252641     | KX252642 | KX252643                  | KX252644 | KX252645 | KX252646 |  |  |  |
| n.a.       | <i>P. lillii</i>                    |                        | 135746 |          |        |        |            | EL-8701, NBRC 32174, AB856779<br>MAFF 237500 | AB856782 | AB856788     | AB856791 | AB856794                  | AB856797 | AB856800 |          |  |  |  |
| outgroup   | <i>Elongisporangium undulatum</i>   |                        | 101728 |          | 337230 | P10342 |            |                                              | EU080440 | EU080441     | EU080442 | n.a.                      | EU080443 | EU080444 | EU080445 |  |  |  |
| outgroup   | <i>Phytophthora vexans</i>          |                        | 340.49 | 12194    |        | P3980  |            | CMI 32 044                                   | EU080483 | EU080484     | EU080485 | n.a.                      | EU080486 | EU080487 | EU080488 |  |  |  |
| outgroup   | <i>Halophytophthora fluvialilis</i> | 57A9                   |        | MVA-4961 |        |        |            |                                              | KX252668 | KX252669     | KX252670 | KX252671                  | KX252672 | KX252673 | KX252674 |  |  |  |
