# Supplementary material for: An expanded phylogeny for the genus Phytophthora
Source: PubMed Central journal article supplement — IMA Fungus. 2017 Nov 21;8(2):355–84. doi: 10.5598/imafungus.2017.08.02.09 (PMC5729717; doi:10.5598/imafungus.2017.08.02.09), 2017-11-21
Supplement: ima-8-355-SD2.pdf [file ima-8-355-SD2.pdf]

## Supplementary Table 2

**Supplementary Table 2.** A list of the 29 isolates found associated with an erroneous or modified identity in this study and their identities as used in this study.

| Local CBS | ATCC            | IMI             | Isolate numbers |        |                                            | (Sub)clade | Identity in this study        | Original identity                                                                               |
|-----------|-----------------|-----------------|-----------------|--------|--------------------------------------------|------------|-------------------------------|-------------------------------------------------------------------------------------------------|
|           |                 |                 | Gallegly        | WPC    | Other                                      |            |                               |                                                                                                 |
| 33F4      |                 |                 | p226            |        | MNT63 (Blanchette)                         | 1a         | <i>P. aff. hedraiaandra</i>   | <i>P. hedraiaandra</i> (Gallegly & Hong 2008, Schwingle <i>et al.</i> 2006)                     |
| 29B3      |                 |                 | p185            |        | 333 (Hansen)                               | 1a         | <i>P. aff. pseudotsugae</i>   | <i>P. pseudotsugae</i> (Gallegly & Hong 2008, Hamm & Hansen 1983)                               |
| 26H4      |                 |                 | p32             |        | 678 (Tsao)                                 | 2a         | <i>P. aff. citrophthora</i>   | <i>P. citrophthora</i> (Gallegly & Hong 2008)                                                   |
| 61G4      | 128754          | 342898          |                 | P10341 |                                            | 2a         | <i>P. aff. colocasiae-1</i>   | (Martin <i>et al.</i> 2014)                                                                     |
| 46C3      | 66767           |                 | p385            | P6713  | NP86                                       | 2a         | <i>P. aff. himalsilva</i>     | <i>P. himalsilva</i> (Vettraino <i>et al.</i> 2011)                                             |
|           |                 |                 |                 |        | Moy 1413                                   | 2a         | <i>P. sp. 46C3</i>            | <i>P. botryosa</i>                                                                              |
|           |                 |                 |                 |        | Rajalakshmy #46                            | 2a         | <i>P. sp. P6262</i>           | <i>P. sp. aff. colocasiae-2</i> (Martin <i>et al.</i> 2014)                                     |
|           |                 |                 |                 |        | #066                                       | 2a         | <i>P. sp. P6310</i>           | <i>P. citrophthora</i> (Martin <i>et al.</i> 2014)                                              |
| 22F5      | 15427, MYA-4035 |                 | p9              |        | N14                                        | 2b         | <i>P. aff. capsici</i>        | <i>P. capsici</i> (Gallegly & Hong 2008)                                                        |
| 22F3      |                 |                 | p33             |        | S813                                       | 2c         | <i>P. sp. 22F3</i>            | <i>P. pini</i> (Hong <i>et al.</i> 2011), <i>P. citricola</i> Cil I (Gallegly & Hong 2008)      |
|           |                 |                 |                 |        | PH-15-21-93                                | 6a         | <i>P. inundata</i>            | <i>P. sp. drechsleri-like</i> (Blair <i>et al.</i> 2008)                                        |
| 22J5      | 16698           |                 | p16             |        | N65                                        | 6b         | <i>P. sp. gregata-like</i>    | <i>P. erythroseptica</i> (Gallegly & Hong 2008)                                                 |
| 23A1      |                 |                 | p81             |        | Hansen 61                                  | 6b         | <i>P. sp. megasperma-like</i> | <i>P. megasperma</i> Meg I (Gallegly & Hong 2008)                                               |
| 23A3      | MYA-3660        |                 | p79             |        | Hansen 50                                  | 6b         | <i>P. sp. megasperma-like</i> | <i>P. megasperma</i> Meg I (Gallegly & Hong 2008)                                               |
| 33F7      |                 |                 | p229            |        | Balci BM4/6                                | 7a         | <i>P. sp. europaea SW</i>     | <i>P. europaea</i> (Gallegly & Hong 2008)                                                       |
| 01D5      |                 |                 | p312            |        |                                            | 7b         | <i>P. niederhauserii</i>      | <i>P. drechsleri</i> (Gallegly & Hong 2008)                                                     |
| 23J6      | MYA-4163        |                 | p57             |        | Ribeiro Israel 2                           | 7b         | <i>P. niederhauserii</i>      | <i>P. drechsleri</i> (Gallegly & Hong 2008)                                                     |
| 22G2      | 308.62          | 15402, MYA-4161 | p12             | 325907 | N57                                        | 8a         | <i>P. aff. cryptogea</i>      | <i>P. cryptogea</i> (Gallegly & Hong 2008)                                                      |
| 22J4      | MYA-4041        |                 | p50             |        | S720                                       | 8a         | <i>P. aff. erythroseptica</i> | <i>P. erythroseptica</i> (Gallegly & Hong 2008)                                                 |
| 33A1      |                 |                 | p207            |        | Lambert 2004S-1                            | 8a         | <i>P. aff. erythroseptica</i> | <i>P. erythroseptica</i> (Gallegly & Hong 2008)                                                 |
| 32E6      |                 |                 |                 | P10728 | Breton 143-1                               | 8b         | <i>P. dauci</i>               | <i>P. sp. aff. brassicae-1</i> (Martin <i>et al.</i> 2014)                                      |
| 32E7      |                 |                 | p194            |        | Breton 148-1                               | 8b         | <i>P. dauci</i>               | <i>P. porri</i> (Gallegly & Hong 2008)                                                          |
| 61E3      | 133815          |                 |                 |        | SCRACE5388                                 | 8b         | <i>P. aff. cichorii</i>       | <i>P. cichorii</i> (Bertier <i>et al.</i> 2013)                                                 |
| 29E7      |                 |                 |                 |        | Man in't Veld PD92/214                     | 8b         | <i>P. sp. 29E7</i>            | <i>P. porri</i> (Gallegly & Hong 2008)                                                          |
|           |                 |                 |                 |        | Banihashemi PH-15-19-92, PH-21-4-08, SUC19 | 9a         | <i>P. aff. parsiana G1</i>    | <i>P. parsiana</i> (Mostowfizadeh-Ghalamfarsa <i>et al.</i> 2008), <i>P. sp. zentmyei</i> (WPS) |
| 47C5      |                 |                 |                 | P8618  | SURf6, Banihashemi PH-21-6-08              | 9a         | <i>P. aff. parsiana G2</i>    | <i>P. parsiana</i> (Mostowfizadeh-Ghalamfarsa <i>et al.</i> 2008)                               |
| 47C6      |                 |                 |                 | 395328 | SURf17, Banihashemi PH-21-7-08             | 9a         | <i>P. aff. parsiana G2</i>    | <i>P. parsiana</i> (Mostowfizadeh-Ghalamfarsa <i>et al.</i> 2008)                               |
|           |                 |                 |                 | 395330 |                                            |            |                               |                                                                                                 |
|           |                 |                 |                 | 395331 |                                            |            |                               |                                                                                                 |

Supplementary Table 2. (Continued).

| Local | CBS    | ATCC     | IMI   | Isolate numbers |       |       | (Sub)clade                     | Identity in this study                      | Original identity |
|-------|--------|----------|-------|-----------------|-------|-------|--------------------------------|---------------------------------------------|-------------------|
|       |        |          |       | Gallegly        | WPC   | Other |                                |                                             |                   |
| 22G7  |        | MYA-3893 |       |                 | S833  | 10    | <i>P. gondwanensis</i>         | <i>P. boehmeriae</i> (Gallegly & Hong 2008) |                   |
| 45F8  | 357,52 | 60173    | 32199 | p350            | P1378 | 10    | <i>P. sp. boehmeriae</i> -like | <i>P. boehmeriae</i> (Gallegly & Hong 2008) |                   |

**References:**

- Bertier L, Brouwer H, De Cock A, Cooke DEL, Olsson CHB, et al. (2013) The expansion of *Phytophthora* clade 8b: three new species associated with winter grown vegetable crops. *Persoonia* **31**: 63–76.
- Blair JE, Coffey MD, Park S-Y, Geiser DM, Kang S (2008) A multi-locus phylogeny for *Phytophthora* utilizing markers derived from complete genome sequences. *Fungal Genetics and Biology* **45**: 266–277.
- Gallegly ME, Hong C (2008) *Phytophthora*: identifying species by morphology and DNA fingerprints. St Paul, MN: American Phytopathological Society Press.
- Hamm P, Hansen EM (1983) *Phytophthora pseudotsugae*, a new species causing root rot of Douglas-fir. *Canadian Journal of Botany* **61**: 2626–2631.
- Hong C, Gallegly ME, Richardson PA, Kong P (2011) *Phytophthora pini* Leonian resurrected to distinct species status. *Mycologia* **103**: 351–360.
- Martin FN, Blair JE, Coffey MD (2014) A combined mitochondrial and nuclear multilocus phylogeny of the genus *Phytophthora*. *Fungal Genetics and Biology* **66**: 19–32.
- Mostowfizadeh-Ghalamfarsa R, Cooke DEL, Banhashemi Z (2008) *Phytophthora parsiana* sp. nov., a new high-temperature tolerant species. *Mycological Research* **112**: 783–794.
- Schwingle BW, Smith JA, Blanchette RA, Gould S, Blanchette BL, et al. (2006) First report of dieback and leaf lesions on *Rhododendron* sp. caused by *Phytophthora hedraiaandra* in the United States. *Plant Disease* **90**: 109.
- Vettraino AM, Brasier CM, Brown AV, Vannini A (2011) *Phytophthora himalsilva* sp. nov. an unusually phenotypically variable species from a remote forest in Nepal. *Fungal Biology* **115**: 275–287.
